# Supplementary material
Source: Royal Society of Chemistry journal article supplement (doi:10.1039/d6tb00573j)
Supplement: d6tb00573j1.pdf [file d6tb00573j1.pdf]

## Supporting Information

### **Coordination-Driven Self-Assembly of Antioxidative and Anti-inflammatory Cerium–Luteolin Nanoparticles for Effective Treatment of Ocular Alkali Burns**

*Chuannan Chen*<sup>1</sup>, *Jie Yu*<sup>3</sup>, *Dongni Yao*<sup>1</sup>, *Yangqi Zhao*<sup>2</sup>, *Qiao Jin*<sup>4</sup>, *Yao Liang*<sup>3</sup>, *Yue Zhao*<sup>3</sup>, *Yi Dong*<sup>3</sup>, *Mengyue Xu*<sup>3</sup>, *Peijin Qiu*<sup>2</sup>, *Liqun Jin*<sup>1\*</sup>, *Chaoyang Hong*<sup>3\*</sup>, *Ting Shen*<sup>2\*</sup>

1. Chuannan Chen, Dongni Yao, Liqun Jin\*

School of Biological Engineering, Zhejiang University of Technology, Hangzhou, Zhejiang, China.

Chuannan Chen, E-mail: 15857602267@163.com

Dongni Yao, E-mail: 15658105988@163.com

Liqun Jin\*, E-mail: jlq@zjut.edu.cn

2. Yangqi Zhao, Peijin Qiu, Ting Shen\*

Eye Center, The Second Affiliated Hospital, Zhejiang University School of Medicine, Hangzhou, Zhejiang, China.

Yangqi Zhao, E-mail: 13616520335@163.com

Peijin Qiu, E-mail: qpeijin@zju.edu.cn

Ting Shen\*, E-mail: medicat@zju.edu.cn

3. Jie Yu, Yao Liang, Yue Zhao, Yi Dong, Mengyue Xu, Chaoyang Hong\*

Department of Ophthalmology, Zhejiang Provincial People's Hospital, Affiliated People's Hospital, Hangzhou Medical College, Hangzhou, Zhejiang, China.

Jie Yu, E-mail: 77janny@163.com

Yao Liang, E-mail: 15350205550@163.com

Yue Zhao, E-mail: 820394834@qq.com

Yi Dong, E-mail: dongyi19990101@163.com

Mengyue Xu, E-mail: mengyuexu@sohu.com

Chaoyang Hong\*, E-mail: hcy1999@sina.com

4. Qiao Jin

MOE Key Laboratory of Macromolecular Synthesis and Functionalization,  
Department of Polymer Science and Engineering, Zhejiang University, Hangzhou,  
Zhejiang, China

E-mail: jinqiao@zju.edu.cn

**Table S1.** PCR primers for macrophages in this study

| Gene           | Forward primer (5'-3')   | Reverse primer (5'-3')    |
|----------------|--------------------------|---------------------------|
| IL-1 $\beta$   | AGAGCATCCAGCTTCAAAT      | CATCTCGGAGCCTGTAGTG       |
| IL-6           | GAGGATACTCACTCCCAACAGACC | AAGTGCATCATCGTTGTTTCATACA |
| IL-10          | GCTCTTACTGACTGGCATGAG    | CGCAGCTCTAGGAGCATGTG      |
| $\beta$ -actin | GGCTGTATTCCCCTCCATCG     | CCAGTTGGTAACAATGCCATGT    |

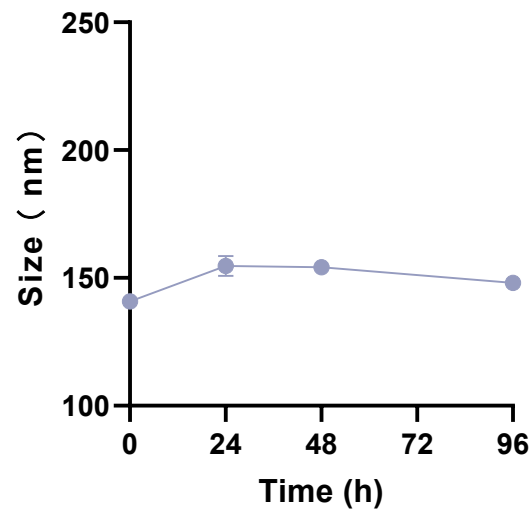

**Figure S1.** Hydrodynamic size of CEL NPs measured by DLS over 96 hours.

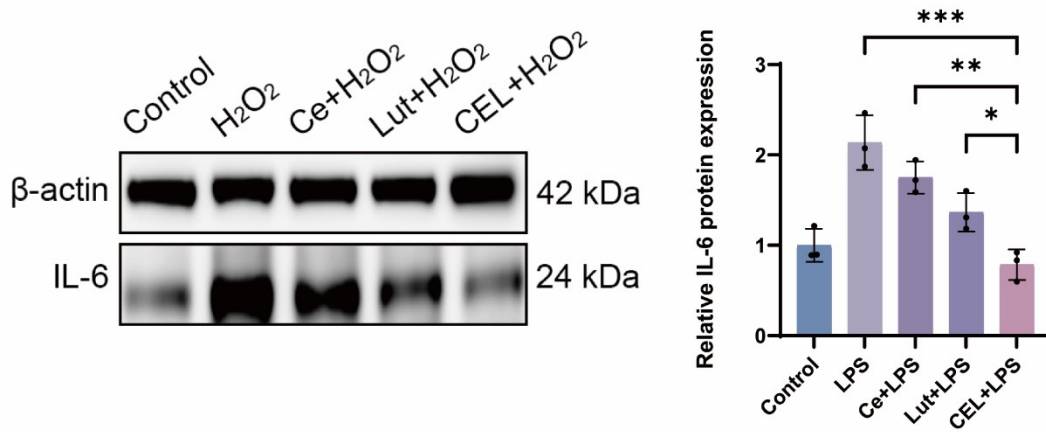

**Figure S2.** Western Blot and quantitative analysis of key protein expression levels (IL-6) in the NF- $\kappa$ B signaling pathway after different treatments in HCECs cells. (n = 3, \*p < 0.05, \*\*P < 0.01, \*\*\*P < 0.001).

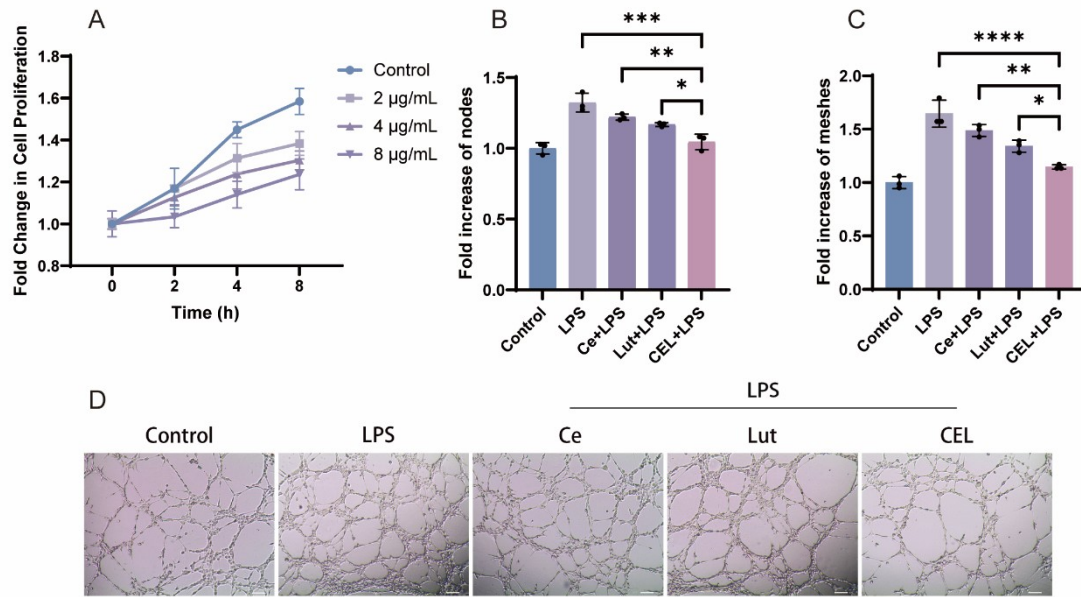

Figure S3. A) Cell proliferation of HUVECs after different treatments. Quantitative analysis of the numbers of nodes (B) and meshes (C). D) Images of tube formation assay in HUVECs after different treatments. (scale bar = 50 µm). (n = 3, \*p < 0.05, \*\*P < 0.01, \*\*\*p < 0.001, \*\*\*\*p < 0.0001, ns = no significance). [LPS] = 500 ng/mL, [CEL NPs] = 5 µg/mL. The concentrations of Ce ions and luteolin were fixed at an equivalent concentration of CEL NPs.

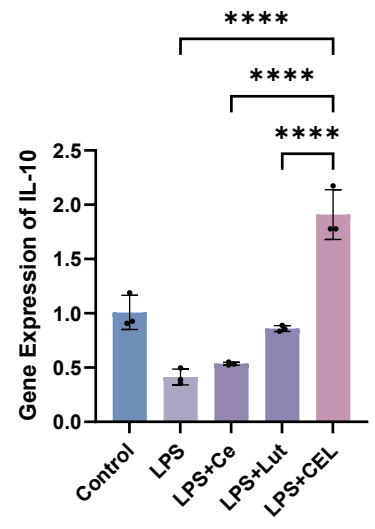

Figure S4. Anti-inflammatory cytokines expression in macrophages subsequent to treatment with diverse drug formulations. The mRNA levels of proinflammatory

factors (IL-10) in RAW264.7 cells were assessed using RT-qPCR.. (n = 3, \*\*\*P < 0.001).

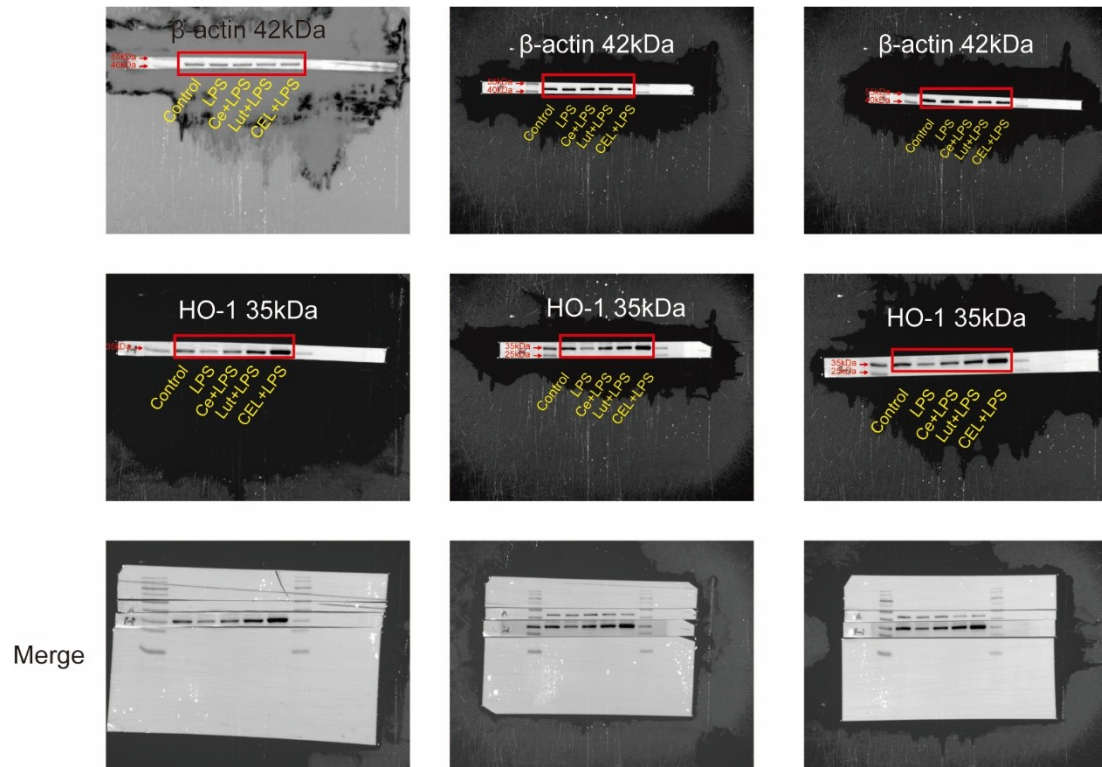

$\beta$ -actin 42kDa

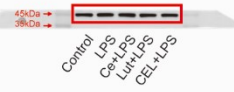

IL-6 24kDa

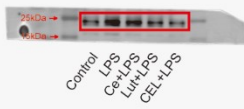

Merge

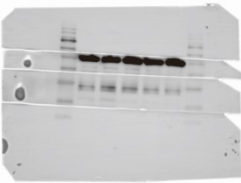

$\beta$ -actin 42kDa

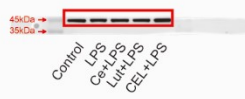

IL-6 24kDa

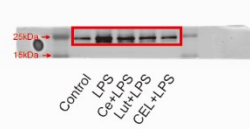

Merge

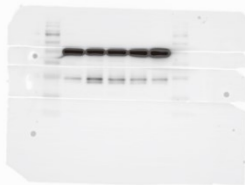

$\beta$ -actin 42kDa

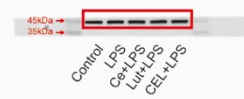

IL-6 24kDa

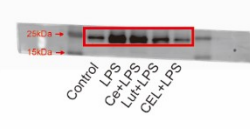

Merge

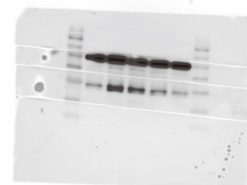

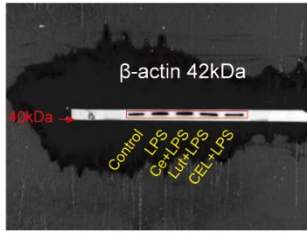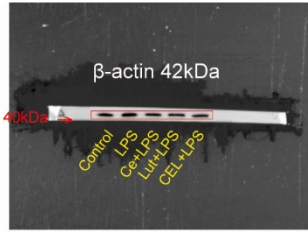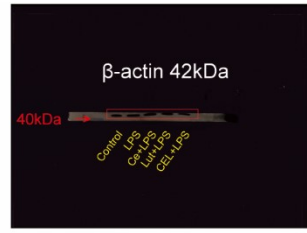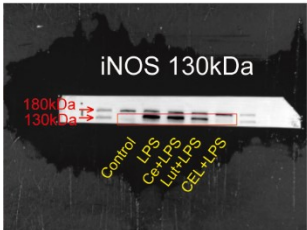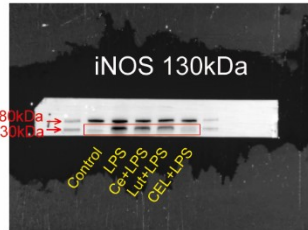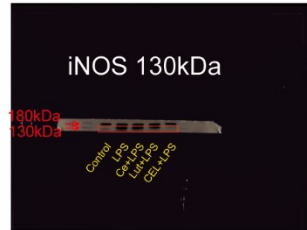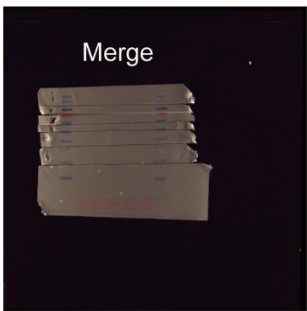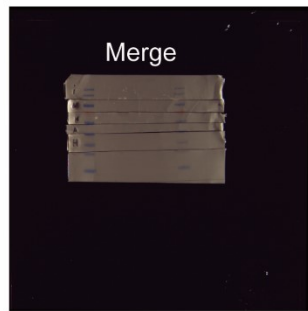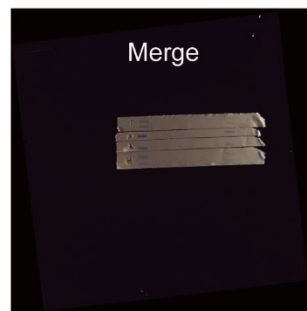

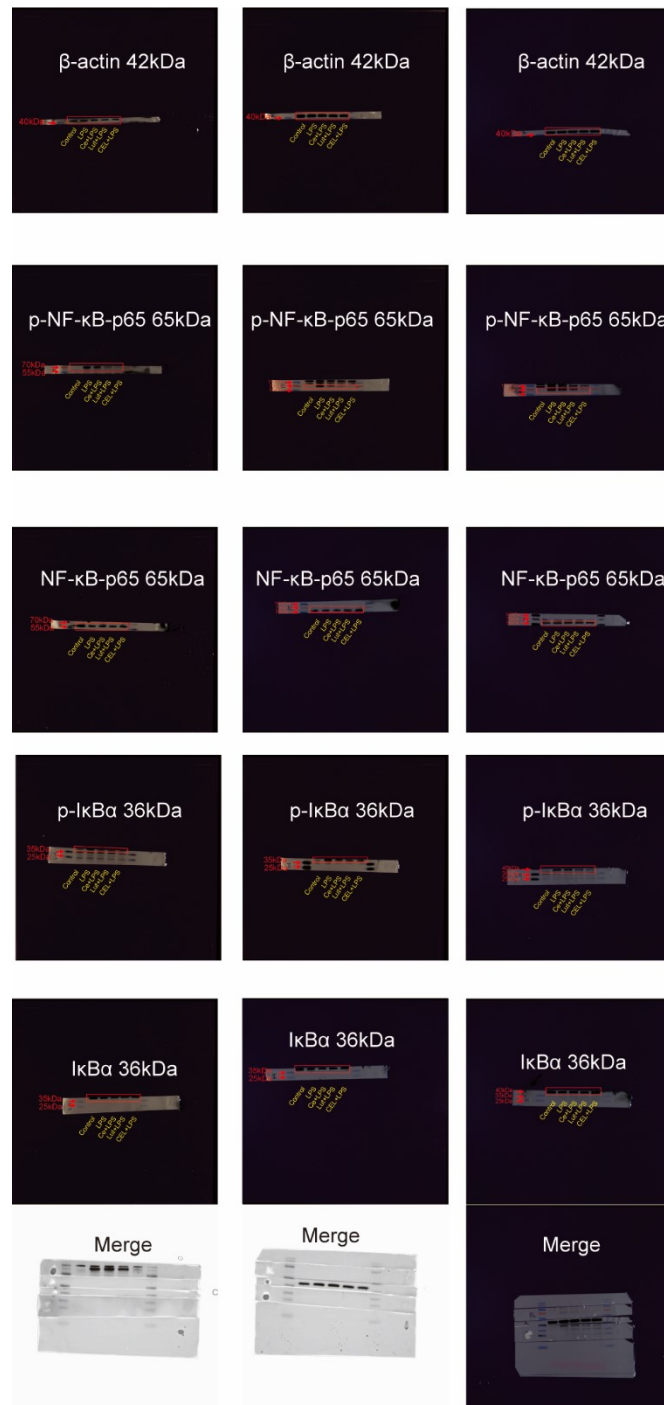

**Figure S5.** Original blots.
